# Supplementary material for: Purification, Conformational Analysis and Cytotoxic Activities of Host-Defense Peptides from the Giant Gladiator Treefrog Boana boans (Hylidae: Hylinae)
Source: MDPI journal article supplement (doi:10.3390/antibiotics12071102), 2023-06-25
Supplement: s1 [file s1]

## Supplementary material

# Purification, Conformational Analysis and Cytotoxic Activities of Host-Defense Peptides from the Giant Gladiator Treefrog *Boana boans* (Hylidae: Hylinae)

J. Michael Conlon, Laure Guilhaudis, Samir Attoub, Laurent Coquet, Jérôme Leprince, Thierry Jouenne and Milena Mechkarska

### Purification of the peptides

The solutions containing the secretions were pooled and partial purification was carried out by passage at a flow rate of approximately 2 mL.min<sup>-1</sup> through 6 Sep-Pak C-18 cartridges (Waters Associates, Milford, MA, USA) connected in series. Bound material was eluted with acetonitrile/water/trifluoroacetic acid (TFA) (70.0:29.9:0.1, v/v/v) and freeze-dried. The material was redissolved in 0.1% (v/v) TFA/water (2 mL) and injected onto a semipreparative (1.0 cm x 25 cm) Vydac 218TP510 (C-18) reversed-phase HPLC column (Grace, Deerfield, IL, USA) equilibrated with 0.1% (v/v) TFA/water at a flow rate of 2.0 mL.min<sup>-1</sup>. The concentration of acetonitrile in the eluting solvent was raised to 21% (v/v) over 10 min and to 63% (v/v) over 60 min using linear gradients. Absorbance was monitored at 214 nm and fractions (1 min) were collected using a BioRad 2110 fraction collector. The peptides within the peaks designated 1 - 8 (Figure 1) that were present in major abundance were subjected to further purification by successive chromatographies on (1.0 cm x 25 cm) Vydac 214TP510 (C-4) and (1.0 cm x 25 cm) Vydac 208TP510 (C-8) columns. The concentration of acetonitrile in the eluting solvent was raised from 21% to 56% (v/v) over 50 min for peaks 1 - 3 and from 28% to 63% over 50 min for peaks 4 - 8. The flow rate was 2.0 mL.min<sup>-1</sup> and fractions were collected by hand.

### Peptide synthesis

Figainin 2BN, picturin 1BN and picturin 2BN were supplied in crude form by PEPMIC (Suzhou, China) and were purified to near homogeneity (> 98% purity) by reversed-phase HPLC on a (2.2 cm x 25 cm) Vydac 218TP1022 (C-18) column equilibrated with acetonitrile/water/ TFA (35.0/64.9.9.9/0.1, v/v/v) at a flow rate of 6 mL.min<sup>-1</sup>. The concentration of acetonitrile was raised to 63% (v/v) over 60 min using a linear gradient. Absorbance was measured at 214 nm and the major peak in the chromatogram was collected manually. The identities of the peptides were confirmed by electrospray mass spectrometry.

### Conformational analysis

Circular Dichroism spectra were recorded on a MOS-500 Circular Dichroism Spectrometer (BioLogic, Seyssinet-Pariset, France). Data

points were collected from 260 to 185 nm, with an integration time of 2 s per point and a step size of 1 nm, using a 1.0 mm path length rectangular quartz cell. Measurements were carried out at room temperature. Figainin 2BN and picturin 1BN were dissolved in water at a concentration of 0.5 mg.mL<sup>-1</sup> and the solution was used to prepare samples containing TFE (25% and 50%), 20 mmol.L<sup>-1</sup> DPC and 10 mmol.L<sup>-1</sup> SDS at a 0.25 mg.L<sup>-1</sup> peptide concentration. Figainin 2BN was insoluble in 20 mmol.L<sup>-1</sup> SDS. Three scans were accumulated and averaged for each sample. All spectra were corrected by subtraction of the background obtained for each peptide-free solution. Circular dichroism measurements are reported as mean residue molar ellipticity ([ $\theta$ ]MRE (deg.cm<sup>2</sup>. dmol<sup>-1</sup>).
